# Supplementary material for: Electrodeposition of gold nanoparticles on a pectin scaffold and its electrocatalytic application in the selective determination of dopamine
Source: Royal Society of Chemistry journal article supplement (doi:10.1039/c4ra08818b), 2014-01-01
Supplement: c4ra08818b1.pdf [file c4ra08818b1.pdf]

## Supplementary Information

### Electrodeposition of gold nanoparticles at pectin scaffold and its electrocatalytic application to the selective determination of dopamine

Rajkumar Devasenathipathy<sup>a</sup>, Veerappan Mani<sup>a</sup>, Shen-Ming Chen<sup>a\*</sup>, Balaji Viswanath<sup>b</sup>, V.S. Vasantha<sup>b\*</sup>, Mani Govindasamy<sup>c</sup>

<sup>a</sup>Electroanalysis and Bioelectrochemistry Lab, Department of Chemical Engineering and Biotechnology, National Taipei University of Technology, No. 1, Section 3, Chung-Hsiao East Road, Taipei 106, Taiwan, ROC.

<sup>b</sup>Department of Natural Products Chemistry, Madurai Kamaraj University, Madurai, Tamil Nadu, India.

<sup>c</sup>Department of Chemistry, Bishop Heber College (Autonomous), Tiruchirappalli-620 017, Tamil Nadu, India.

Corresponding author, \*Shen-Ming Chen: E-mail: [smchen78@ms15.hinet.net](mailto:smchen78@ms15.hinet.net). Tel: +886 2270 17147, Fax: +886 2270 25238.

Corresponding author, \*V.S. Vasantha: E-mail: [sivarunjan@gmail.com](mailto:sivarunjan@gmail.com). Tel: + 91 - 452 - 245 8471, Ex: 108, Fax: + 91 - 452 - 245 8449.

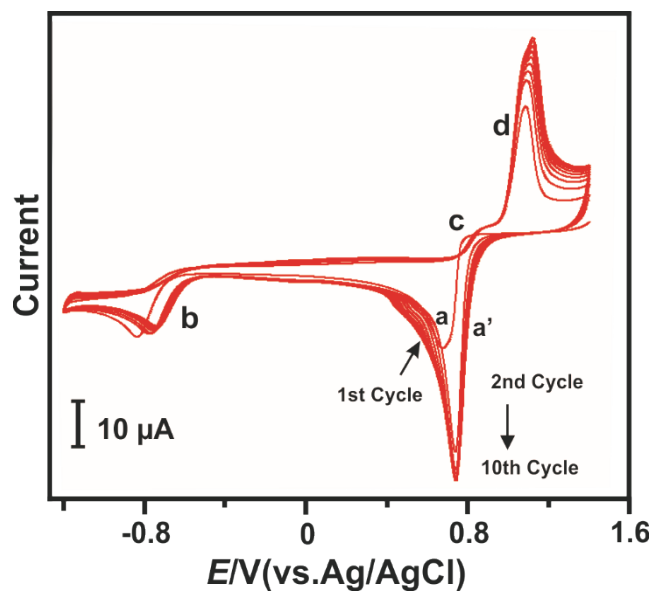

**Fig. S1** The electrochemical deposition of Au nanoparticles (without pectin) at the GCE in 0.1 M  $\text{KNO}_3$  containing 0.1 mM of  $\text{HAuCl}_4$  for 10 cycles (control). Scan rate =  $25 \text{ mV s}^{-1}$ .

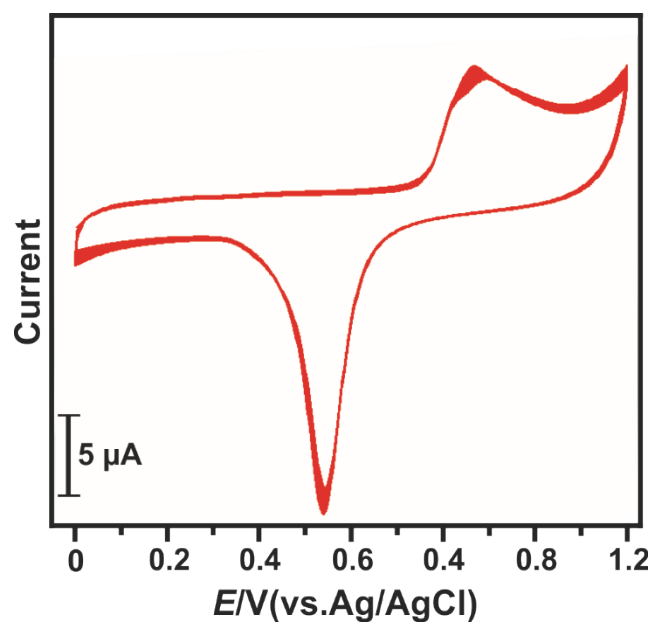

**Fig. S2** Consecutive CVs obtained at GCE/pectin-Au NPs for 200 cycles in PBS (pH 7) at the scan rate  $50 \text{ mVs}^{-1}$ .

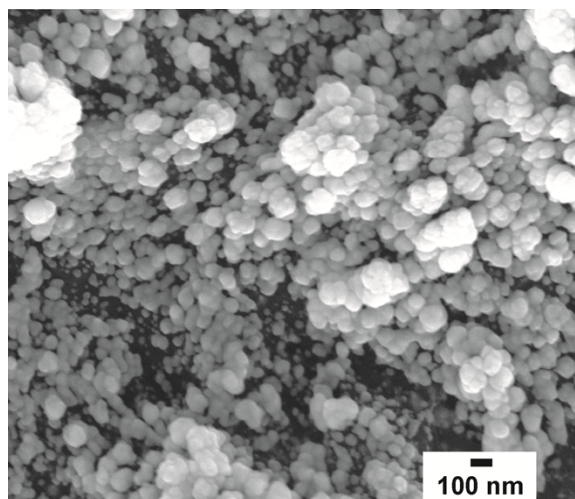

**Fig. S3** The SEM image of Au NPs/GCE

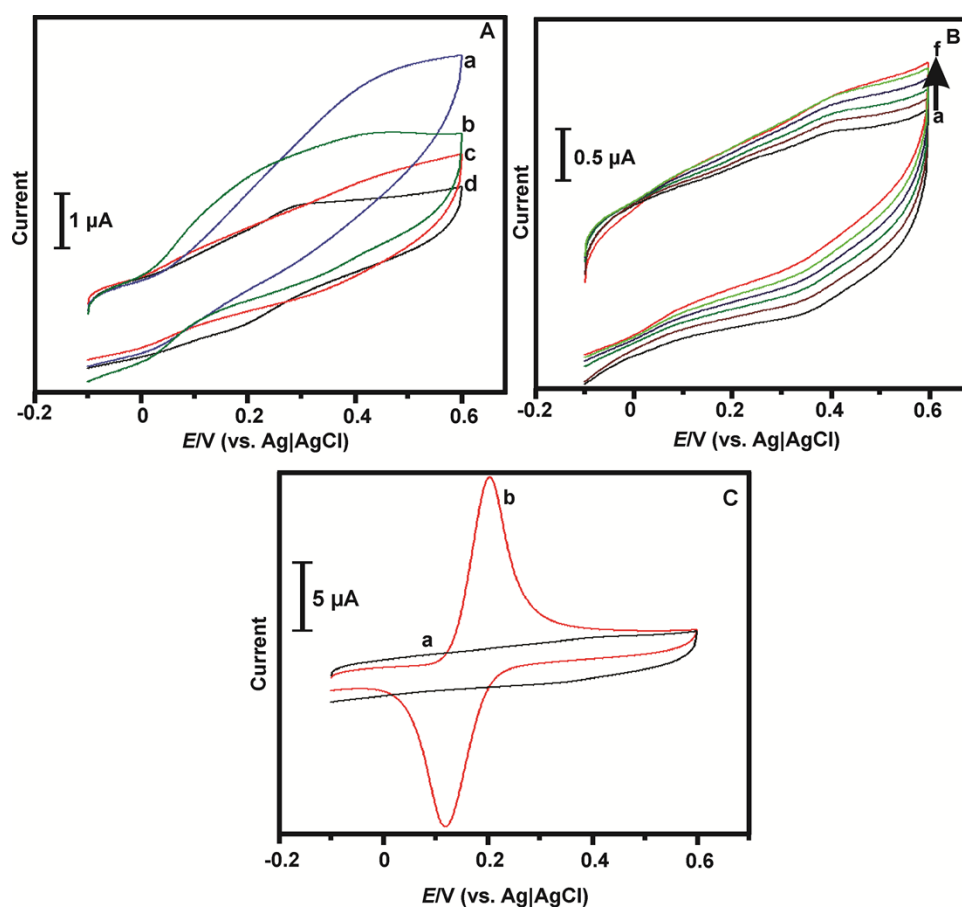

**Fig S4:** (A) CVs obtained at GCE/pectin-Au NPs in the absence (a) and presence of nafion 0.5% (b), 1% (c) 1.5% (d) in PBS (pH 7) at the scan rate  $25 \text{ mVs}^{-1}$ . (B) CVs obtained at pectin-Au NPs/Nf film modified GCE in the absence (a) and presence of 1 to 4 mM ascorbic acid (curves b

to e) in PBS (pH 7) at the scan rate 25 mVs<sup>-1</sup>. (C) CVs obtained at the pectin-Au NPs/Nf film modified GCE in the presence of 2 mM AA (a) and 0.5 mM DA (b).

**Table S1** The signal ratio to the blank signal for the each addition of AA at GCE/pectin-Au NPs/Nf

| [Ascorbic acid]/mM | Signal ratio to blank signal/% |
|--------------------|--------------------------------|
| 0                  | -                              |
| 1                  | 1.9                            |
| 2                  | 2.3                            |
| 3                  | 3.3                            |
| 4                  | 4.1                            |
